# Supplementary material
Source: publisher figshare collection journal article supplement (https://sage.figshare.com/ndownloader/files/15143045)
Supplement: Supplementary file 1 [file 15143045]

Supplemental Table

Item properties in the college and clinical samples

| Item |  | College students (n = 1,419) | | | |  | Cardiac patients (n = 214) | | | |
| --- | --- | --- | --- | --- | --- | --- | --- | --- | --- | --- |
|  |  | Mean | *SD* | Skewness | Kurtosis |  | Mean | *SD* | Skewness | Kurtosis |
|  |  |  |  |  |  |  |  |  |  |  |
| 1. 1. | I consider every difficulty as a challenge. | 3.17 | .76 | .20 | .05 |  | 3.34 | .84 | .06 | -.38 |
| 1. 2. | I recover from crises quickly. | 3.25 | .98 | -.03 | -.54 |  | 3.55 | .78 | -.07 | -.39 |
| 1. 3. | I would hold on straight to the end for things that are valuable to me. | 3.83 | .82 | -.40 | -.03 |  | 3.66 | .77 | -.31 | -.19 |
| 1. 4. | I actively seek out opportunities. | 3.23 | .82 | .16 | .06 |  | 3.54 | .81 | -.16 | -.44 |
| 1. 5. | I never give up no matter how much difficulty I face. | 3.23 | .80 | .10 | -.07 |  | 3.64 | .81 | -.49 | .35 |
| 1. 6. | I feel that life is valuable. | 3.51 | 1.11 | -.36 | -.60 |  | 3.73 | .81 | -.28 | -.32 |
| 1. 7. | I put up with hardships. | 3.58 | .93 | -.25 | -.36 |  | 3.71 | .81 | -.21 | -.41 |
| 1. 8. | I have people who support me. | 3.42 | 1.04 | -.30 | -.60 |  | 3.74 | .78 | -.24 | -.27 |
| 1. 9. | I dare to try new things. | 3.26 | .93 | -.03 | -.43 |  | 3.60 | .76 | -.29 | -.21 |
| 1. 10. | I see everything from its good side. | 3.07 | .99 | .01 | -.39 |  | 3.64 | .75 | -.09 | -.31 |
| 1. 11. | I am determined to achieve my goals. | 3.43 | .89 | -.02 | -.37 |  | 3.67 | .74 | -.26 | -.11 |
| 1. 12. | 1. I will be rewarded for all my efforts. | 3.30 | 1.12 | -.27 | -.63 |  | 3.61 | .91 | -.34 | -.30 |
| 1. 13. | 1. I am willing to spend more time if I can reach my goals. | 3.91 | .84 | -.59 | .22 |  | 3.74 | .83 | -.63 | .49 |
| 1. 14. | 1. I face difficulties head-on. | 3.33 | .87 | -.11 | -.23 |  | 3.64 | .74 | -.16 | -.22 |
| 1. 15. | 1. I am a relentless learner. | 3.52 | .92 | -.14 | -.45 |  | 3.55 | .82 | -.14 | -.47 |
| 1. 16. | 1. I hold on to my beliefs. | 3.77 | .90 | -.42 | -.13 |  | 3.69 | .76 | -.17 | -.28 |
| 1. 17. | 1. I try again in a different way when I do not succeed the first time. | 3.49 | .94 | -.21 | -.33 |  | 3.57 | .79 | -.20 | -.08 |
